# Supplementary material
Source: PubMed Central journal article supplement (PMC5762275)
Supplement: NIHMS917675-supplement-1.pdf [file NIHMS917675-supplement-1.pdf]

Figure S1. Confirmation of gene expression change in imaged islets and washout of artemether does not facilitate alpha to beta cell transdifferentiation. Related to Figure 1

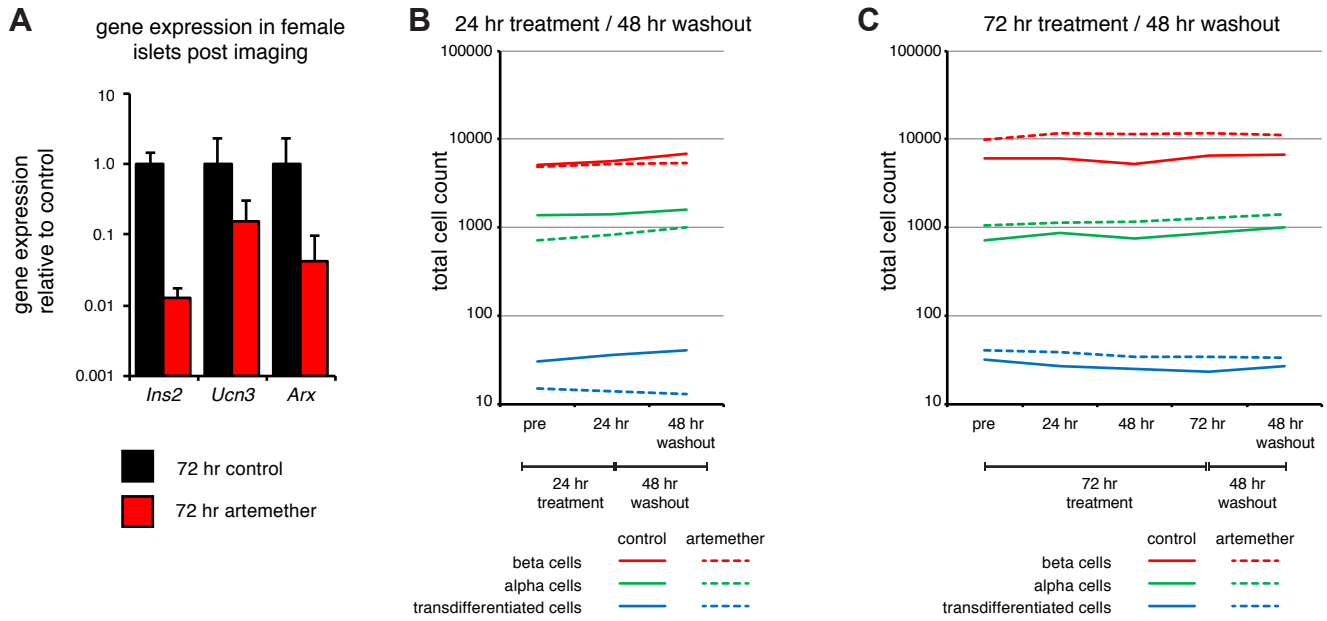

**Figure S1. Confirmation of gene expression change in imaged islets and washout of artemether does not facilitate alpha to beta cell transdifferentiation. Related to Figure 1**

(A) Confirmation of gene expression changes in the islets of 2 female mice at the conclusion of the image acquisition in Figure 1B-F.

(B) Quantification of the total number of alpha, beta, and alpha-to-beta transdifferentiated cells. The same islets were imaged, stimulated with 10  $\mu$ M artemether as indicated. Artemether was then washed out via media changes and the same islets were imaged 48 hr after the end of artemether stimulation. >10 islets for each treatment from a single *mIns1*-H2b-mCherry x *Gcg*-Cre x *Rosa26*-STOP-YFP triple transgenic mouse.

(C) Quantification of the total number of alpha, beta, and alpha-to-beta transdifferentiated cells. The same islets were imaged repeatedly in 3D at 24 hr intervals under stimulation with 10  $\mu$ M artemether as indicated. Artemether was then washed out media changes and the same islets were imaged 48 hr after the end of artemether stimulation. >10 islets for each treatment from two *mIns1*-H2b-mCherry x *Gcg*-Cre x *Rosa26*-STOP-YFP triple transgenic mice.

Figure S2. Re-analysis of single cell RNAseq data from Li et al., 2017. Related to Figure 1.

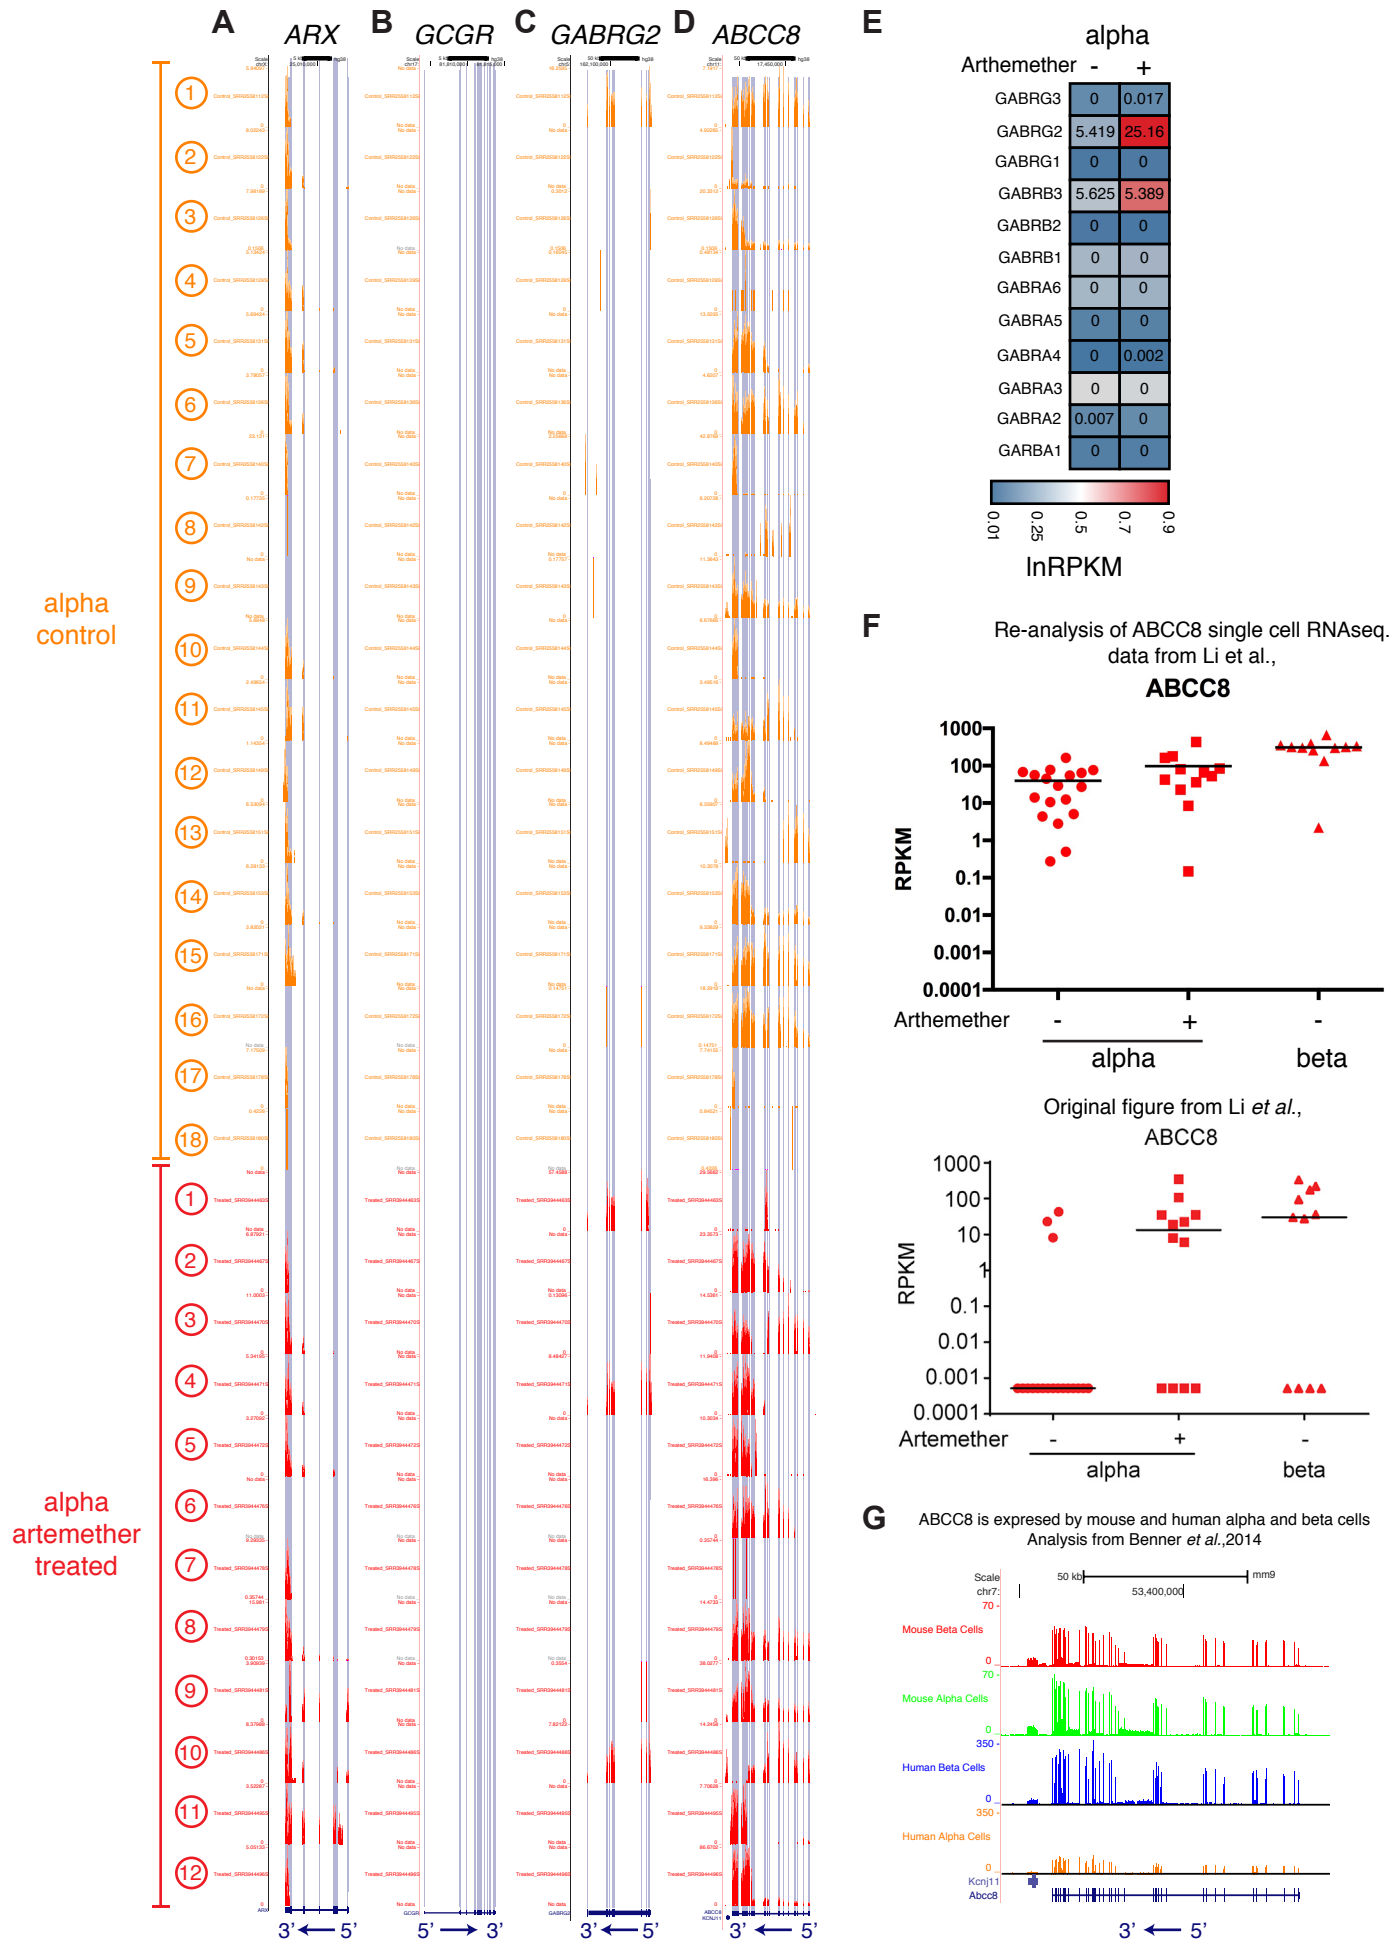

**Figure S2. Re-analysis of single cell RNAseq data from Li et al., 2017. Related to Figure 1.**

(A) Browser plots of *ARX* expression of the 18 single control alpha cells and 12 artemether-treated alpha cells reveal no evidence for artemether-induced inhibition of *ARX*. Note the 3' bias in all alpha cells where *ARX* is detected. RNAseq data from GEO: GSE73727 and GSE84714.

(B) Browser plots illustrate that none of the alpha cells in their study demonstrates detectable *GCGR* expression.

(C) Browser plots illustrate that *GABRG2* is detected in only 1 of 18 control and 3 of 12 artemether-treated cells.

(D) Browser plots illustrate that *ABCC8* is readily detected in most single alpha cells regardless of treatment. Note that sequence coverage tends to span the entire gene model (indicated by the blue columns).

(E) Modification of the heat map of human GABA receptor subunit genes. The original color coding by Li et al. is overlaid with the actual number of reads per kilobase of gene model per million reads sequenced (RPKM). Note that we are unable to detect any reads for the majority of GABA receptor genes. For *GABRG2*, which has the highest differential expression following artemether treatment, this expression is concentrated in a minority of single alpha cells. See also (C).

(F) Expression plot indicating *ABCC8* expression based on reanalysis of the single alpha cell RNAseq data by Li et al., There is no difference in *ABCC8* expression between control and artemether-treated single alpha cells. The original graph of these data by Li et al. is included for reference.

(G) Browser plots of bulk RNAseq data to indicate that *ABCC8* is robustly expressed by human and mouse alpha and beta cells. Analysis by Benner et al., 2012.

Table S1: Primers used for quantitative PCR. Related to Figure 2.

| RefSeq ID    | Gene          | Oligonucleotide | Sequence                    | amplicon length (bp) |
|--------------|---------------|-----------------|-----------------------------|----------------------|
| NM_007492    | <i>Arx</i>    | qmARX.fwu1      | TTCCAGAAGACGCACTACCC        | 68                   |
|              |               | qmARX.rvu1      | TCTGTCCAGGTCAGCCTCAT        |                      |
| NM_007522    | <i>Bad</i>    | qmBAD.fwu1      | CCACCAACAGTCATCATGGA        | 121                  |
|              |               | qmBAD.rvu1b     | CGTCCTCGAAAAGGGCTAA         |                      |
| XM_006540584 | <i>Bax</i>    | qmBAX.fwu2      | AGTGTCTCCGGCGAATTG          | 69                   |
|              |               | qmBAX.rvu2      | CCACGTCAGCAATCATCCT         |                      |
| NM_009741    | <i>Bcl2</i>   | qmBCL2.fwu2     | GTACCTGAACCGGCATCTG         | 76                   |
|              |               | qmBCL2.rvu2     | GGGGCCATATAGTTCCACAA        |                      |
| NM_001289716 | <i>Bclxl</i>  | qmBCLXL.fwu1    | TGACCACCTAGAGCCTTGGGA       | 68                   |
|              |               | qmBCLXL.rvu1    | TGTTCCCGTAGAGATCCACAA       |                      |
| NM_001163434 | <i>Bip</i>    | Bip.fwu1        | GGAGACTGCTGAGGCGTATT        | 105                  |
|              |               | Bip.rvu1        | GTGCCAGCATCTTTGGTTG         |                      |
| NM_008100    | <i>Gcg</i>    | qrodGcg.fwu1    | TCACAGGGCACATTCACCAG        | 121                  |
|              |               | qrodGcg.rvu1    | CATCATGACGTTTGGCAATGTT      |                      |
| NM_008245    | <i>Hhex</i>   | qmHhex.fwu1     | CTACACGCACGCCCTACTC         | 76                   |
|              |               | qmHhex.rvu1     | CAGAGGTCGCTGGAGGAA          |                      |
| NM_013556    | <i>Hprt</i>   | qmHPRT.fwu      | TCCTCCTCAGACCGCTTTT         | 90                   |
|              |               | qmHPRT.rvu      | CCTGGTTCATCATCGCTAATC       |                      |
| NM_008386    | <i>Ins1</i>   | qmINS1.fwu1     | CAGAGAGGAGGTACTTTGGACTATAAA | 113                  |
|              |               | qmINS1.rvu1     | GCCATGTTGAAACAATGACCT       |                      |
| NM_001185084 | <i>Ins2</i>   | qrodINS2.fw1    | GCTCTCTACCTGGTGTGTGGG       | 128                  |
|              |               | qrodINS2.rv1    | CAAGGTCTGAAGGTCACCTGC       |                      |
| NM_010573    | <i>Irx1</i>   | qmlrx1.fwu1     | GCCCCACAACAGTTAAAGTC        | 111                  |
|              |               | qmlrx1.rvu1     | CCCCTTAATCAGGCAGACG         |                      |
| NM_194350    | <i>MafA</i>   | qmMAFA.fwu1     | CTCCAGAGCCAGGTGGAG          | 66                   |
|              |               | qmMAFA.rvu1     | GTACAGGTCCCGCTCCTTG         |                      |
| NM_010658    | <i>Mafb</i>   | qmMAFB.fwu1     | GCAGGTATAAACGCGTCCAG        | 61                   |
|              |               | qmMAFB.rvu1     | TGAATGAGCTGCGTCTTCTC        |                      |
| NM_008814    | <i>Pdx1</i>   | qmPdx1.fwu1     | GAAATCCACCAAAGCTCACG        | 65                   |
|              |               | qmPdx1.rvu1     | CGGGTTCGCTGTGTAAG           |                      |
| NM_031197    | <i>Slc2a2</i> | qmGLUT2.fwu2    | GGGCCATCAACATGATCTTC        | 86                   |
|              |               | qmGLUT2.rvu2    | AATCATCCCGGTTAGGAACA        |                      |
| NM_009215    | <i>Sst</i>    | qrodSS.fw1      | GACCCAGACTCCGTGAGTTT        | 112                  |
|              |               | qrodSS.rv1      | TCTCTGTCTGGTTGGGCTCG        |                      |
| NM_001009935 | <i>Txnip</i>  | Txnip.fwu1      | CTTGCGCTATGAAGACACACTT      | 75                   |
|              |               | Txnip.rvu1      | GGCCTCATGATCACCATCTC        |                      |
| NM_031250    | <i>Ucn3</i>   | qmUcn 3.fwu1    | GCTGTGCCCTCGACCT            | 71                   |
|              |               | qmUcn 3.rvu1    | TGGGCATCAGCATCGCT           |                      |
