# Supplementary material
Source: PubMed Central journal article supplement (PMC5762275)
Supplement: NIHMS917675-supplement-5.pdf [file NIHMS917675-supplement-5.pdf]

## SUPPLEMENTAL INFORMATION

Title: **Artemether Does Not Turn Alpha Cells into Beta Cells**

### **Supplemental information Inventory**

Figure S1, Related to Figure 1

Figure S2, Related to Figure 1

Table S1, Related to Figure 2.
